# Supplementary material
Source: PubMed Central journal article supplement (PMC4053943)
Supplement: NIHMS583547-supplement-supplement.pdf [file NIHMS583547-supplement-supplement.pdf]

## 1 **Supplemental Materials and Methods**

2 **Cell lines and drugs.** Mouse cell lines 595BzS, 595BzR, 589BzS and 589BzR were cultured  
3 as previously described (1). Briefly, cell were maintained in murine PC media containing RPMI  
4 1640 (Lonza, Allendale, NJ), 15% fetal bovine serum (FBS) (Cellgro, Mediatech, Manassas,  
5 VA), 25 mmol/L HEPES (Lonza), 1mmol/L sodium pyruvate, 50 µmol/L beta-mercaptoethanol  
6 (Sigma-Aldrich, St. Louis, MO), 50 units/ml of penicillin and streptomycin (Thermo Fisher  
7 Scientific, Waltham, MA), 2 mmol/L L-glutamine (Gibco Life Technologies, Grand Island, NY)  
8 and 0.5 ng/ml interleukin (IL)-6 (R&D Systems, Minneapolis, MN). Cells were split every 3 days  
9 and maintained at concentrations between  $2-5 \times 10^6$  cells/mL.

10 Bortezomib (Bz) (Millennium Pharmaceuticals, Inc., Cambridge, MA) was dissolved in  
11 serum-free RPMI 1640.

12 **Fluorescence analysis and sorting.** To detect both intracellular and cell-surface CXCR4  
13 expression, cells were first stained with anti-mouse CD184/CXCR4-PE (clone 2B11,  
14 eBioscience, San Diego, CA) antibody or Rat IgG2b kappa-PE isotype control (eBioscience)  
15 and then fixed using the Cytofix/Cytoperm Fixation/Permeabilization kit (BD Biosciences, San  
16 Jose, CA), blocked in buffer containing 30% FBS, 0.1% Saponin and 20 mM HEPES, and  
17 stained a second time with the same antibodies. Samples were analyzed using the  
18 FACSCalibur and FlowJo Software (Tree Star, Ashland, OR).

19 **Human gene expression profiling analysis.** Plasma cell purifications and gene expression  
20 profiling, using the Affymetrix U133Plus2.0 microarray (Affymetrix, Santa Clara, CA), were  
21 performed as previously described (2, 3). Gene expression profiles of CD138<sup>+</sup> bone marrow  
22 plasma cells from MM patients enrolled in the APEX (3) and MMTT3 (2) clinical trials were used  
23 in these studies. Signal intensities were pre-processed and normalized by GCOS1.1 software  
24 (Affymetrix). We performed permutation analyses to correlate *CXCR4* expression with patient  
25 survival in the APEX phase 3 trial (n=156) and total therapy 3 trial (TT3, n=214), respectively.  
26 The presented p value was based on the best cut-off (50% patients in high- or low-*CXCR4*

27 group) between these 2 parameters in each dataset. All statistical analyses were performed  
28 with the use of the statistical software R (Version 2.6.2) (<http://www.r-project.org>).

29

30

31

32

33

34

35

36

37

38

39

40

41

42

43

44

45

46

47

48

49

50

51

52

53 **References**

- 54 1. Stessman HA, Baughn LB, Sarver A, Xia T, Deshpande R, Mansoor A, *et al.* Profiling  
55 bortezomib resistance identifies secondary therapies in a mouse myeloma model. *Mol*  
56 *Cancer Ther* 2013 Mar 27.
- 57
- 58 2. Shaughnessy JD, Jr., Qu P, Usmani S, Heuck CJ, Zhang Q, Zhou Y, *et al.* Pharmacogenomics of  
59 bortezomib test-dosing identifies hyperexpression of proteasome genes, especially PSMD4,  
60 as novel high-risk feature in myeloma treated with total therapy 3. *Blood* 2011 May 31.
- 61
- 62 3. Mulligan G, Mitsiades C, Bryant B, Zhan F, Chng WJ, Roels S, *et al.* Gene expression profiling  
63 and correlation with outcome in clinical trials of the proteasome inhibitor bortezomib.  
64 *Blood* 2007 Apr 15; **109**(8): 3177-3188.
- 65
- 66
- 67
